# Supplementary material for: E2A-PBX1 Remodels Oncogenic Signaling Networks in B-cell Precursor Acute Lymphoid Leukemia
Source: Oxford University Press journal article supplement (doi:10.1158/0008-5472.can-16-1899), 2016-10-07
Supplement: 00085472can161899-sup-168872_2_supp_3684620_ff8ffh.docx [file 00085472can161899-sup-168872_2_supp_3684620_ff8ffh.docx]

**Supplemental Information**

**Signaling network remodeling by E2A-PBX1 in B-cell precursor ALL**

Jesús Duque-Afonso, Chiou-Hong Lin, Kyuho Han, Michael C. Wei, Jue Feng, Jason Kurzer, Corina Schneidawind, Stephen Hon-Kit Wong, Michael C. Bassik, and Michael L. Cleary

**Supplementary Figure 1.**  **E2A-PBX1 binds regulatory regions of its target genes** **ZAP70, SYK and LCK.** Visualization ofChIP-seq data for ZAP70, SYK and LCK genes(1) and of DNaseI hypersensitivity peaks of selected immortalized cell lines analyzed within the ENCODE project (2) using Integrative Genomics Viewer (IGV) software. Right panels show relative mRNA expression for above mentioned genes by RNAseq within the ENCODE Project (2). TPM, Transcripts per million. Highlighted in red are ChIP-seq peaks validated in RCH-ACV cells in Figure 2B. Comparison sites (P) were chosen in the promoter regions of ZAP70 and SYK and intergenic region of LCK. NCAPD2 and TBP genes were used as control genes not bound by E2A-PBX1.

**Supplementary Figure 2. Expression of ZAP70, SYK and LCK in primary ALLs depending on the karyotype.** Published data sets were analyzed for *ZAP70*, *SYK* and *LCK* expression levels in **(A)** E2A-PBX1 versus human primary B-ALL with different karyotypes (3)and **(B)** E2A-PBX1 versus non-E2A-PBX1 ALLs(4).

**Supplementary Figure 3.** **Oncogenic roles of ZAP70, SYK and LCK in mouse E2A-PBX1 leukemias. (A)** Bar graphs represent transcript levels of indicated genes after shRNA-mediated knock down in mouse preBCR+ leukemia cells. Transcript levels were quantified by RT-qPCR after 7 days of transduction and normalized to β-actin. Data represent mean ± SEM (n=3 independent experiments). **(B)** Colony forming capacity was quantified after shRNA knock-down of indicated genes in mouse preBCR+ and preBCR- leukemias. Colonies were enumerated after 7 days and results are expressed relative to control shRNA-transduced cells. Data represent mean ± SEM (n=3 independent experiments). Statistical analysis performed by Student’s t-test, * p-value <0.05, ** p-value<0.01. **(C)** Kaplan-Meier curves show disease-free survival of secondary recipients (n=5 mice in each cohort) transplanted with 1000 mouse preBCR+ leukemia cells transduced with shRNA for luciferase (control) or for indicated genes. Statistical analysis was performed using the log-rank (Mantel-Cox) test.

**Supplementary Figure 4. Genetic interactions among E2A-PBX1 target genes decreases cell proliferation and survival. (A)** Schematic representation of genetic interaction studies. Human ALL cells were co-transduced with vectors co-expressing shRNAs and GFP or mCherry as fluorescence markers. After 7 days, double positive cells for GFP and mCherry were sorted and used in read-out experiments. **(B)** Light and fluorescence microscopy images of RCH-ACV cells transduced with vectors containing ZAP70 or LCK shRNAs (original magnification 10x). **(C)** Dot plots from a representative flow cytometry show untransduced, single transduced and co-transduced cells with vectors co-expressing shRNAs with GFP or mCherry. **(D)** RCH-ACV and 697 cells were co-transduced with vectors containing shRNAs for SYK and ZAP70 or **(E)** for SYK and LCK. *Upper panel,* western blot showing the expression of indicated proteins. GAPDH was used as loading control. *Lower panel,* cell concentration relative to control cells 5 days after sorting. Data represent mean ± SEM (n=3 independent experiments). Statistical analysis in **(C)** and **(D)** performed by Student’s t-test.

**Supplementary Figure 5.** **Depletion of ZAP70, SYK and LCK increases sensitivity to small molecule inhibitors targeting PLCγ2 upstream pathways. A.** Schematic representation of studies to assess interaction between gene-depletion by shRNA and small molecules. RCH-ACV cells were transduced with shRNAs for luciferase (GFP) and genes of interest (mCherry) and mixed 50/50 at day 0. After 6 days, cells were treated with small molecule inhibitors for 18 days and mCherry+ cells were monitored every 3 days. Diagrams show mean +/- SEM (n=3 independent experiments) of mCherry+ cells transduced with shRNA for luciferase (control) or **(B)** SYK or **(C)** LCK, treated with dasatinib (20nM), R406 (500nM) or A770041 (500nM).

**Supplementary Figure 6. Preclinical efficacy of combination treatment with small molecules in preBCR+ E2A-PBX1+ leukemias. (A)** Dose response curves of E2A-PBX1 RCH-ACV cells treated with increasing concentrations of R406 (SYKi) in combination with either vehicle or A770041 (LCKi, 1μM), in colony forming assays. Data represent mean ± SEM (n=3 independent experiments). **(B)** Titration curves are shown for mouse preBCR+ (n=3) and preBCR- (n=3) leukemia cells cultured in increasing concentrations of R406 in combination with either vehicle or A770041 (200nM). Data represent the mean ± SEM. **(C)** Titration curves are shown for mouse preBCR+ leukemia cells (n=3) cultured in methylcellulose at increasing concentrations of dasatinib in combination with either vehicle or R406 (200 nM) or A770041 (200nM). Data represent the mean ± SEM. Statistical analysis performed by F test, *** p-value <0.001, ** p-value <0.01, n.s. not significant.

**Supplementary Table 1. Antibodies for flow cytometry analysis and FACS.**

| **Antigen** | **Fluorochrome** | **Clone** | **Source** |
| --- | --- | --- | --- |
| CD19 | APC-Cy7 | 1D3 | BD Biosciences |
| CD43 | APC | S7 | BD Biosciences |
| CD3 | PE | 145-2C11 | BD Biosciences |
| CD4 | PE | RM4-5 | BD Biosciences |
| CD8 | PE | E53-6.7 | eBiosciences |
| CD11b | PE | M1/70 | eBiosciences |
| Gr1 | PE | RB6-8C5 | BD Biosciences |
| NK1.1 | PE | PK136 | eBiosciences |
| Ter119 | PE | TER-119 | eBiosciences |
| VPREB (CD179a) | PE | HSL96 | Biolegend |

| **Antigen** | **Fluorochrome** | **Clone** | **Source** |
| --- | --- | --- | --- |
| pSTAT5 pY694 | PE | 47 | BD Biosciences |
| pPLCγ2 pY759 | Alexa 647/PE | K86-689.37 | BD Biosciences |

**Supplementary Table 2. Conjugated antibodies for phospho-flow analysis**

**Supplementary Table 3. Taqman probes used for RT-qPCR**

| **Species** | **Target gene** | **Taqman probe**  **(from Life Technologies)** |
| --- | --- | --- |
| Human | PLCγ2 | Hs01101857_m1 |
| Human | ZAP70 | Hs00896347_m1 |
| Human | SYK | Hs00895377_m1 |
| Human | LCK | Hs00178427_m1 |
| Human | PBX1 | Hs00231228_m1 |
| Human | ACTB | 4352935 (Applied Biosystems) |
| Mouse | Plcγ2 | Mm01242530_m1 |
| Mouse | Zap70 | Mm00494255_m1 |
| Mouse | Syk | Mm01333032_m1 |
| Mouse | Lck | Mm00802897_m1 |
| Mouse | Actb | Mm00607939_s1 |

**Supplementary Table 4. shRNA sequences**

| **Species** | **Gene target** | **Target shRNA target sequence 5’->3’** |
| --- | --- | --- |
| Human | PLCγ2 | GGACAAAGAGTTGACTCTTCA |
| Human | ZAP70 | GCTGGTGGAGTATCTGAAGCT |
| Human | SYK | CAACTACTACAAGTTCTCCAGCAAA |
| Human | LCK | CACCCGGAAGATGACTGGATGGAAA |
| Human | PBX1 | GGAGCATTCAGATTACAGA |
| Human | FYN | TCCCAGCAATTATGTGGCTCCAGTT |
| Human | BCL6 | CCTCCTCGTGAAGAGTTCCTCAACA |
| Mouse | Plcγ2 | GGGAGAAATGGTTCCACAAGA |
| Mouse | Zap70 | GCATGCGAGCCTGTTACTACA |
| Mouse | Syk | GATCAGCGATTTCGGTCTTTCCAAA |
| Mouse | Lck | CAGGGAGAGGTGGTGAAACATTACA |

**Supplementary Table 5. Primers for DNA-qPCR for chromatin immunoprecipitation (ChIP) assays.**

| **Species** | **Gene target** | **Region** |  | **Primer sequence** |
| --- | --- | --- | --- | --- |
| Human | ZAP70 | P | FW | GGCACTAGAGGGGAGATGGA |
| Human | ZAP70 | P | RW | GACCTTTCCCACGAAGCTGA |
| Human | ZAP70 | #1 | FW | TGGGGTGGTGCTTGTGATTA |
| Human | ZAP70 | #1 | RW | ATGACCCGAGGCTAAGGAGT |
| Human | SYK | P | FW | GCCATGCAGTGGAGTCTCTT |
| Human | SYK | P | RW | CTTCTGTGACTGCCCAGGAC |
| Human | SYK | #1 | FW | GAGTCTGATGGCCTGGTCTG |
| Human | SYK | #1 | RW | TGCAGGTTCCATGTCTGCTT |
| Human | LCK | P | FW | GTTGGGGGAGCAGATCTTGG |
| Human | LCK | P | RW | CTGTCTCGCCTCTTACCGTG |
| Human | LCK | #1 | FW | ACAAGCCCCAACAATGCTCT |
| Human | LCK | #1 | RW | ATCAGGTCCAAGAACTCGGC |
| Human | TBP | #1 | FW | AGGCATGGTGCCTCACAGACGT |
| Human | TBP | #1 | RW | ACCTGTTTGCCATTGCTTGCTGTTT |
| Human | NCAPD2 | #1 | FW | ATGGTTGCCACTGGGGATCT |
| Human | NCAPD2 | #1 | RW | TGCCAAAGCCTAGGGGAAGA |

**References for supplementary information**

1. Geng H, Hurtz C, Lenz KB, et al. Self-enforcing feedback activation between BCL6 and pre-B cell receptor signaling defines a distinct subtype of acute lymphoblastic leukemia. Cancer Cell. 2015;27(3):409-25.

2. The ENCODE Project Consortium. An integrated encyclopedia of DNA elements in the human genome. Nature 2012;489(7414):57-74.

3. Coustan-Smith E, Song G, Clark C, et al. New markers for minimal residual disease detection in acute lymphoblastic leukemia. Blood. 2011; 117(23): 6267-76.

4. Haferlach T, Kohlmann A, Wieczorek L, et al. Clinical utility of microarray-based gene expression profiling in the diagnosis and subclassification of leukemia: report from the International Microarray Innovations in Leukemia Study Group. J Clin Oncol. 2010; 28(15): 2529-37.
